# Supplementary material for: Broadly neutralizing anti-S2 antibodies protect against all three human betacoronaviruses that cause severe disease
Source: PubMed Central journal article supplement — bioRxiv. 2022 Mar 7:2022.03.04.479488. Preprint. [Version 1] doi: 10.1101/2022.03.04.479488 (PMC8923106; doi:10.1101/2022.03.04.479488), 2022-03-07
Supplement: NIHPP2022.03.04.479488V1-supplement-1.pdf [file NIHPP2022.03.04.479488V1-supplement-1.pdf]

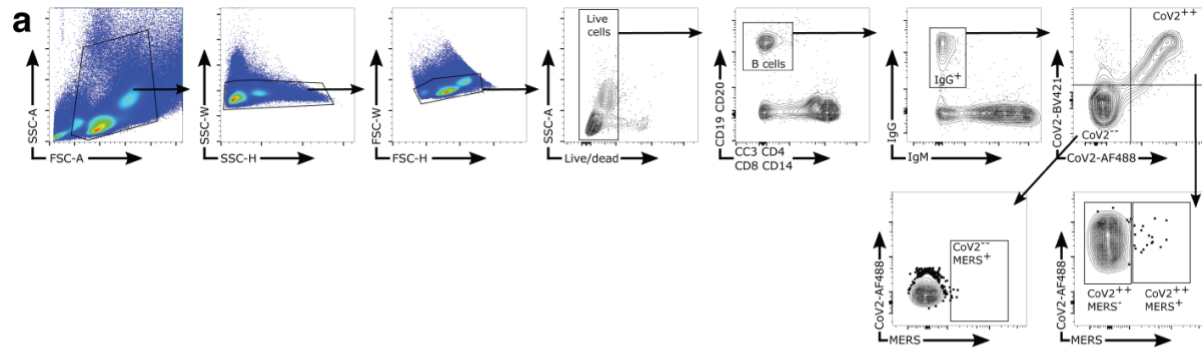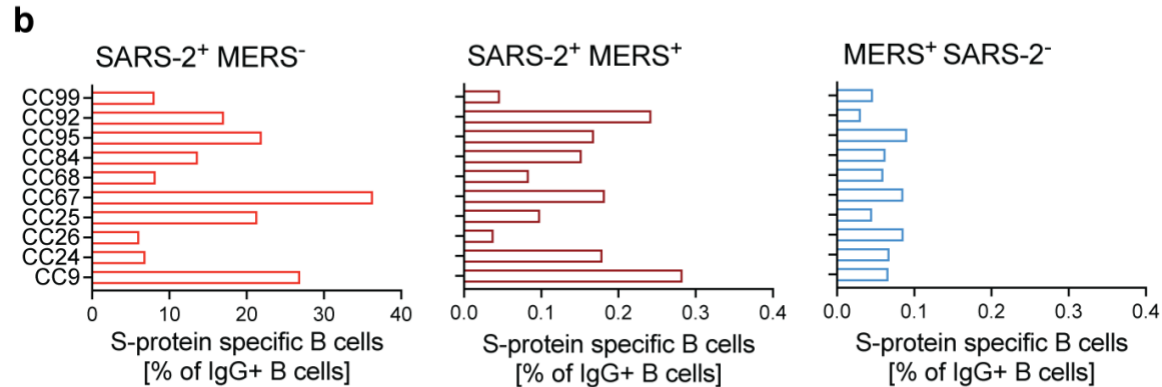

| Donor | SARS-2/MERS spike double positive B cells | H/L paired antibodies recovered | (% Efficiency) | Antibodies positive for SARS-2/MERS stem helix peptides binding* | % stem-helix directed |    |
|-------|-------------------------------------------|---------------------------------|----------------|------------------------------------------------------------------|-----------------------|----|
| CC9   | 50                                        | 38                              | 76             | 10                                                               | 26                    |    |
| CC24  | 20                                        | 15                              | 75             | 2                                                                | 13                    |    |
| CC25  | 26                                        | 16                              | 62             | 7                                                                | 44                    |    |
| CC26  | 3                                         | 0                               | 0              | 0                                                                | 0                     |    |
| CC67  | 40                                        | 31                              | 78             | 3                                                                | 10                    |    |
| CC68  | 16                                        | 11                              | 69             | 2                                                                | 18                    |    |
| CC84  | 44                                        | 20                              | 45             | 2                                                                | 10                    |    |
| CC92  | 99                                        | 83                              | 84             | 2                                                                | 2                     |    |
| CC95  | 52                                        | 27                              | 52             | 9                                                                | 33                    |    |
| CC99  | 8                                         | 6                               | 75             | 3                                                                | 50                    |    |
| Total | 10                                        | 358                             | 247            | 69                                                               | 40                    | 16 |

971  
 972 **Supplementary Figure 1. Flow cytometry B cell profiling, sorting strategy and**  
 973 **SARS-CoV-2 and MERS-CoV S-protein specific B cells in infected-vaccinated**  
 974 **donors. a.** Gating strategy for analysis of IgG<sup>+</sup> B cell populations that bind MERS-CoV  
 975 S-protein only (CD3<sup>-</sup>CD4<sup>-</sup>CD8<sup>-</sup>CD14<sup>-</sup>CD19<sup>+</sup>CD20<sup>+</sup>IgM<sup>-</sup>IgG<sup>+</sup>CoV2<sup>-</sup>MERS-CoV<sup>+</sup>), SARS-  
 976 CoV-2 S-protein only (CD3<sup>-</sup>CD4<sup>-</sup>CD8<sup>-</sup>CD14<sup>-</sup>CD19<sup>+</sup>CD20<sup>+</sup>IgM<sup>-</sup>IgG<sup>+</sup>CoV2<sup>++</sup>MERS-CoV<sup>-</sup>),  
 977 or both MERS-CoV and SARS-CoV-2 S-proteins (CD3<sup>-</sup>CD4<sup>-</sup>CD8<sup>-</sup>CD14<sup>-</sup>CD19<sup>+</sup>CD20<sup>+</sup>IgM<sup>-</sup>  
 978 IgG<sup>+</sup>CoV2<sup>++</sup>MERS-CoV<sup>+</sup>). **b.** The frequencies of SARS-CoV-2 S-protein-specific IgG<sup>+</sup> B  
 979 cells (left), SARS-CoV-2 and MERS-CoV double positive S-protein-specific IgG<sup>+</sup> cross-  
 980 reactive B cells (middle) or MERS-CoV S-protein-specific IgG<sup>+</sup> B cells (right) in PBMCs of  
 981 10 infected vaccinated-vaccinated donors. **c.** Summary of the number of SARS-CoV-2 and  
 982 MERS-CoV double positive S-protein specific cross-reactive B cells recovered from each  
 983 of the donor, number and efficiency of heavy and light chain paired recovered, number of  
 984 stem-helix mAb in each donor and their frequency out of the S-protein specific cross-  
 985 reactive IgG B cells.

| Antibody ID | Hy-gene     | D1-gene     | H-gene   | HC-REGION<br>Identity % | CDRL3-MGMT<br>length | HC-AAA<br>FUNCTION | K/KL-GENE   | L-gene     | LC-REGION<br>Identity % | CDRL3-MGMT<br>length | LC-AAA<br>FUNCTION | S-Proteins                 |          |           |           |           |           | Spikes        |            |          |           |           |           | Polyreactivity |         |         |       |            |         |   |   |    |    |
|-------------|-------------|-------------|----------|-------------------------|----------------------|--------------------|-------------|------------|-------------------------|----------------------|--------------------|----------------------------|----------|-----------|-----------|-----------|-----------|---------------|------------|----------|-----------|-----------|-----------|----------------|---------|---------|-------|------------|---------|---|---|----|----|
|             |             |             |          |                         |                      |                    |             |            |                         |                      |                    | EC <sub>50</sub> (Binding) |          |           |           |           |           | MFI (Binding) |            |          |           |           |           | Antibody ID    | CHO-SMP | Insulin | ssDNA | HEp2 assay |         |   |   |    |    |
|             |             |             |          |                         |                      |                    |             |            |                         |                      |                    | SARS-CoV-2                 | MERS-CoV | HCoV-OC43 | HCoV-NL63 | HCoV-229E | MOCK-203T | SARS-CoV-2    | SARS-CoV-1 | MERS-CoV | HCoV-OC43 | HCoV-NL63 | HCoV-229E |                |         |         |       |            |         |   |   |    |    |
| CC9-104     | IGHV1-46*01 | IGHD3-19*01 | IGHJ4*02 | 95                      | 8                    | CARGSGGKFFW        | IKRV3-20*01 | IGKJ3*01   | 96                      | 11                   | CGQYSSPPPIFF       | CC9-104                    | 0.01     | 0.01      | 0.02      | 8.31      | 0.06      | >10           | >10        | 2358     | 1E+05     | 1E+05     | 1E+05     | 7527           | 24414   | 3151    | 3361  | CC9-104    | N       | N | N | +  |    |
| CC9-106     | IGHV1-46*01 | IGHD3-19*01 | IGHJ4*02 | 95                      | 8                    | CARGSGGKFFW        | IKRV3-20*01 | IGKJ3*01   | 97                      | 11                   | CGYSSPPPIFF        | CC9-106                    | 0.01     | 0.02      | 0.03      | 2.98      | 0.18      | >10           | >10        | 2159     | 2E+05     | 8706      | 1E+05     | 77010          | 25364   | 2475    | 2163  | CC9-106    | N       | N | N | +  |    |
| CC9-111     | IGHV1-46*01 | IGHD3-3*01  | IGHJ4*02 | 91                      | 13                   | CASGFGKFLFDW       | IKRV3-20*01 | IGKJ4*01   | 95                      | 11                   | CGYSSPPPIFF        | CC9-111                    | 0.01     | 0.04      | 0.08      | >10       | 0.30      | >10           | >10        | 1407     | 1E+05     | 4913      | 1E+05     | 77178          | 29361   | 2266    | 2150  | CC9-111    | Y       | N | N | +  |    |
| CC9-113     | IGHV1-46*01 | IGHD3-3*01  | IGHJ4*02 | 94                      | 11                   | CASGFGKFLFDW       | IKRV3-20*01 | IGKJ4*01   | 95                      | 11                   | CGYSSPPPIFF        | CC9-113                    | 0.01     | 0.02      | 0.01      | 0.66      | 0.19      | >10           | >10        | 1978     | 1E+05     | 5702      | 1E+05     | 1E+05          | 4367    | 2516    | 2481  | CC9-113    | N       | N | N | ++ |    |
| CC9-131     | IGHV1-46*01 | IGHD3-3*01  | IGHJ4*02 | 92                      | 11                   | CASGFGKFLFDW       | IKRV3-20*01 | IGKJ3*01   | 95                      | 11                   | CGYSSPPPIFF        | CC9-131                    | 0.02     | 0.03      | 0.02      | 0.28      | 0.87      | >10           | >10        | 1996     | 1E+05     | 4421      | 1E+05     | 8203           | 8180    | 2448    | 2401  | 2418       | CC9-131 | N | N | N  | ++ |
| CC9-116     | IGHV1-46*01 | IGHD3-19*01 | IGHJ4*02 | 93                      | 8                    | CARGSGGKFFW        | IKRV3-20*01 | IGLJ7-4*01 | 95                      | 10                   | CGYSSPPPIFF        | CC9-116                    | 0.02     | 0.10      | 0.28      | >10       | >10       | >10           | >10        | 2003     | 1E+05     | 3630      | 1E+05     | 6462           | 3108    | 2173    | 2021  | CC9-116    | N       | N | N | +  |    |
| CC9-130     | IGHV3-23*01 | IGHD2-2*02  | IGHJ4*02 | 95                      | 13                   | CAFFLQKQLHFLFDW    | IKRV3-20*01 | IGKJ3*01   | 96                      | 9                    | CGQYSSPPPIFF       | CC9-130                    | 0.02     | 0.02      | 0.17      | >10       | >10       | >10           | >10        | 2304     | 1E+05     | 8262      | 94209     | 14406          | 2264    | 20725   | 15004 | CC9-130    | Y       | Y | Y | ++ |    |
| CC9-107     | IGHV3-49*05 | IGHD3-2*01  | IGHJ5*01 | 89                      | 8                    | CATTHADYK          | IKGV4-1*01  | IGKJ5*01   | 92                      | 9                    | CGYSSPPPIFF        | CC9-107                    | 0.01     | 0.03      | 0.02      | >10       | 0.58      | >10           | >10        | 2488     | 1E+05     | 4348      | 6298      | 4787           | 1791    | 2481    | 2259  | CC9-107    | N       | N | N | ++ |    |
| CC9-114     | IGHV3-49*05 | IGHD3-2*01  | IGHJ5*01 | 89                      | 8                    | CATTHADYK          | IKGV4-1*01  | IGKJ5*01   | 91                      | 9                    | CGYSSPPPIFF        | CC9-114                    | 0.02     | 0.05      | 0.02      | >10       | 0.38      | >10           | >10        | 1991     | 1E+05     | 3073      | 6425      | 4252           | 3048    | 2121    | 2027  | CC9-114    | Y       | Y | Y | ++ |    |
| CC9-124     | IGHV3-7*03  | IGHD3-2*01  | IGHJ4*02 | 95                      | 7                    | CATKRGK            | IKGV4-1*01  | IGKJ3*01   | 97                      | 9                    | CGYSSPPPIFF        | CC9-124                    | 0.02     | 0.05      | 1.43      | >10       | 3.34      | >10           | >10        | 1947     | 1E+05     | 41976     | 18331     | 7938           | 6762    | 2295    | 2026  | CC9-124    | N       | N | N | +  |    |
| CC9-105     | IGHV1-46*01 | IGHD3-3*01  | IGHJ4*02 | 91                      | 10                   | CAMTLKDFYD         | IKRV3-20*01 | IGKJ3*01   | 95                      | 11                   | CGYSSPPPIFF        | CC9-105                    | 0.02     | 0.05      | 0.14      | >10       | 0.68      | >10           | >10        | 16287    | 2E+05     | 4126      | 36379     | 4595           | 16081   | 11601   | 8381  | CC9-105    | Y       | Y | Y | ++ |    |
| CC9-107     | IGHV1-46*01 | IGHD3-3*01  | IGHJ4*02 | 94                      | 10                   | CAMTLKDFYD         | IKRV3-20*01 | IGKJ3*01   | 96                      | 11                   | CGYSSPPPIFF        | CC9-107                    | 0.01     | 0.03      | 0.08      | >10       | 0.36      | >10           | >10        | 2342     | 2E+05     | 52719     | 4919      | 2470           | 3236    | 3627    | 2787  | CC9-107    | N       | N | N | +  |    |
| CC9-104     | IGHV1-46*01 | IGHD3-10*01 | IGHJ4*02 | 92                      | 10                   | CAMLSKDFYD         | IKRV3-20*01 | IGKJ3*01   | 97                      | 11                   | CGYSSPPPIFF        | CC9-104                    | 0.01     | 0.02      | 0.01      | 1.95      | 0.60      | >10           | >10        | 2377     | 2E+05     | 7530      | 2E+05     | 8603           | 3095    | 2677    | 2475  | CC9-104    | N       | N | N | -  |    |
| CC9-108     | IGHV1-46*01 | IGHD3-10*01 | IGHJ4*02 | 95                      | 10                   | CAMLSKDFYD         | IKRV3-20*01 | IGKJ3*01   | 97                      | 11                   | CGYSSPPPIFF        | CC9-108                    | 0.01     | 0.01      | 0.03      | >10       | >10       | >10           | >10        | 2620     | 2E+05     | 6181      | 8038      | 4115           | 2818    | 2938    | 2294  | CC9-108    | N       | N | N | +  |    |
| CC9-103     | IGHV1-46*01 | IGHD3-2*01  | IGHJ4*02 | 97                      | 13                   | CARGSGGKFFW        | IKRV1-12*01 | IGKJ3*01   | 96                      | 11                   | CGYSSPPPIFF        | CC9-103                    | 0.01     | 0.02      | 0.01      | 0.88      | 0.11      | >10           | >10        | 1636     | 2E+05     | 1E+05     | 2E+05     | 9996           | 4763    | 2889    | 2623  | CC9-103    | N       | N | N | ++ |    |
| CC9-106     | IGHV1-46*01 | IGHD3-10*01 | IGHJ4*02 | 93                      | 10                   | CARGSGGKFFW        | IKRV3-20*01 | IGLJ1-1*01 | 97                      | 11                   | CGYSSPPPIFF        | CC9-106                    | 0.02     | 0.03      | 0.02      | 0.67      | 0.47      | >10           | >10        | 2056     | 2E+05     | 8360      | 2E+05     | 8819           | 3996    | 2385    | 2661  | CC9-106    | N       | N | N | ++ |    |
| CC9-112     | IGHV3-23*01 | IGHD3-19*01 | IGHJ4*02 | 96                      | 12                   | CAVYVTVYVFDW       | IKRV3-20*01 | IGKJ5*01   | 98                      | 9                    | CGYSSPPPIFF        | CC9-112                    | 0.01     | 0.02      | 1.36      | >10       | >10       | >10           | >10        | 2189     | 2E+05     | 1E+05     | 3709      | 7237           | 2988    | 3584    | 2531  | CC9-112    | N       | N | N | ++ |    |
| CC9-101     | IGHV3-23*04 | IGHD4-1*01  | IGHJ2*01 | 95                      | 13                   | CAMTVYKDFYD        | IKRV3-20*01 | IGKJ2*01   | 96                      | 9                    | CGYSSPPPIFF        | CC9-101                    | 0.04     | 0.04      | 0.05      | >10       | >10       | >10           | >10        | 2387     | 2E+05     | 8012      | 6598      | 9978           | 2511    | 2545    | 2382  | CC9-101    | N       | N | N | ++ |    |
| CC9-105     | IGHV4-31*03 | IGHD3-2*01  | IGHJ3*01 | 93                      | 15                   | CAMTSAGGSGSAMFW    | IKGV1-51*01 | IGLJ2*02   | 95                      | 10                   | CGAMSSSLWF         | CC9-105                    | 0.02     | 0.05      | 0.03      | >10       | >10       | >10           | >10        | 15034    | 2E+05     | 59737     | 7865      | 7757           | 3707    | 3468    | 2951  | CC9-105    | N       | N | N | ++ |    |
| CC9-108     | IGHV1-46*01 | IGHD3-10*01 | IGHJ4*02 | 94                      | 10                   | CYVAVSGDFD         | IKRV3-20*01 | IGKJ3*01   | 94                      | 11                   | CGYSSPPPIFF        | CC9-108                    | 0.02     | 0.03      | 0.04      | >10       | >10       | >10           | >10        | 2292     | 2E+05     | 6480      | 95054     | 6317           | 4595    | 3183    | 2843  | CC9-108    | N       | N | N | -  |    |
| CC9-105     | IGHV3-23*01 | IGHD3-13*01 | IGHJ4*02 | 92                      | 11                   | CAMTVYKDFYD        | IKRV3-20*01 | IGKJ1*01   | 97                      | 9                    | CGYSSPPPIFF        | CC9-105                    | 0.01     | 0.02      | 0.43      | >10       | >10       | >10           | >10        | 16486    | 2E+05     | 6105      | 5485      | 2615           | 4737    | 4821    | 3821  | CC9-105    | N       | Y | N | ++ |    |
| CC9-130     | IGHV3-23*04 | IGHD3-19*01 | IGHJ4*02 | 92                      | 12                   | CAMTVYKDFYD        | IKRV3-20*01 | IGKJ4*01   | 94                      | 9                    | CGYSSPPPIFF        | CC9-130                    | 0.01     | 0.02      | 2.97      | >10       | >10       | >10           | >10        | 2551     | 2E+05     | 1E+05     | 1E+05     | 665            | 2391    | 391     | 3561  | CC9-130    | N       | N | N | -  |    |
| CC9-104     | IGHV1-46*01 | IGHD3-2*01  | IGHJ4*02 | 94                      | 11                   | CARGSGGKFFW        | IKRV3-20*01 | IGKJ3*01   | 98                      | 11                   | CGYSSPPPIFF        | CC9-104                    | 0.01     | 0.01      | 0.01      | 4.08      | 0.58      | >10           | >10        | 1719     | 1E+05     | 4036      | 2E+05     | 6849           | 2881    | 2438    | 2047  | CC9-104    | N       | N | N | -  |    |
| CC9-109     | IGHV1-46*01 | IGHD3-2*01  | IGHJ4*02 | 95                      | 11                   | CARGSGGKFFW        | IKRV3-20*01 | IGKJ3*01   | 98                      | 11                   | CGYSSPPPIFF        | CC9-109                    | 0.01     | 0.04      | 0.01      | >10       | 0.45      | >10           | >10        | 1763     | 1E+05     | 4668      | 1E+05     | 6761           | 3200    | 2161    | 2117  | CC9-109    | N       | N | N | -  |    |
| CC9-102     | IGHV1-46*01 | IGHD3-10*01 | IGHJ4*02 | 95                      | 12                   | CAMTVYKDFYD        | IKRV1-4*01  | IGLJ2*01   | 97                      | 10                   | CGAMSSSLWF         | CC9-102                    | 0.01     | 0.02      | 0.10      | 0.18      | 0.33      | >10           | >10        | 2471     | 1E+05     | 7538      | 1E+05     | 7243           | 3036    | 2788    | 2428  | CC9-102    | N       | N | N | ++ |    |
| CC9-115     | IGHV1-46*01 | IGHD3-6*01  | IGHJ4*02 | 95                      | 13                   | CASFPGSSSLGW       | IKGV1-12*01 | IGKJ3*01   | 96                      | 11                   | CGYSSPPPIFF        | CC9-115                    | 0.01     | 0.01      | 3.06      | >10       | >10       | >10           | >10        | 2159     | 1E+05     | 5075      | 2096      | 2697           | 3033    | 2512    | 2279  | CC9-115    | N       | Y | N | ++ |    |
| CC9-133     | IGHV1-46*01 | IGHD1-26*01 | IGHJ2*01 | 96                      | 11                   | CARGSGGKFFW        | IKRV3-20*01 | IGKJ2*01   | 93                      | 11                   | CGYSSPPPIFF        | CC9-133                    | 0.04     | 0.03      | 0.04      | >10       | 0.43      | >10           | >10        | 1185     | 1E+05     | 5025      | 2E+05     | 4835           | 2648    | 2316    | 2148  | CC9-133    | Y       | Y | Y | ++ |    |
| CC9-127     | IGHV1-46*01 | IGHD3-10*01 | IGHJ4*02 | 91                      | 11                   | CAMTVYKDFYD        | IKRV3-20*01 | IGKJ2*01   | 92                      | 11                   | CGYSSPPPIFF        | CC9-127                    | 0.01     | 0.02      | 0.10      | 0.18      | 0.33      | >10           | >10        | 2471     | 1E+05     | 7538      | 1E+05     | 7243           | 3036    | 2788    | 2428  | CC9-127    | N       | N | N | ++ |    |
| CC9-108     | IGHV1-46*01 | IGHD3-15*01 | IGHJ4*02 | 93                      | 10                   | CARGSGGKFFW        | IKRV1-51*02 | IGLJ2*02   | 95                      | 11                   | CGAMTVYKDFYD       | CC9-108                    | 0.01     | 0.02      | 0.01      | 0.68      | 0.09      | >10           | >10        | 1631     | 1E+05     | 8062      | 2E+05     | 8045           | 4096    | 4152    | 3558  | CC9-108    | N       | N | N | ++ |    |
| CC9-109     | IGHV1-46*01 | IGHD3-15*01 | IGHJ4*02 | 95                      | 10                   | CARGSGGKFFW        | IKRV1-51*02 | IGLJ2*02   | 95                      | 11                   | CGYSSPPPIFF        | CC9-109                    | 0.01     | 0.03      | 0.02      | >10       | 1.37      | >10           | >10        | 1959     | 1E+05     | 5296      | 1E+05     | 20142          | 3434    | 2381    | 2101  | CC9-109    | N       | N | N | ++ |    |
| CC9-118     | IGHV1-46*01 | IGHD3-10*01 | IGHJ4*02 | 93                      | 10                   | CAMTVYKDFYD        | IKRV3-20*01 | IGKJ3*01   | 95                      | 11                   | CGYSSPPPIFF        | CC9-118                    | 0.01     | 0.01      | 0.01      | >10       | >10       | >10           | >10        | 1897     | 2E+05     | 6219      | 1E+05     | 2973           | 3668    | 2793    | 2890  | CC9-118    | N       | N | N | -  |    |
| CC9-122     | IGHV1-46*01 | IGHD3-10*01 | IGHJ4*02 | 91                      | 12                   | CAMLSKDFYD         | IKRV1-51*02 | IGLJ2*02   | 93                      | 11                   | CGAMSSSLWF         | CC9-122                    | 0.01     | 0.01      | 0.01      | 0.08      | 0.65      | >10           | >10        | 2778     | 2E+05     | 8401      | 2E+05     | 2E+05          | 3441    | 3415    | 2942  | CC9-122    | N       | N | N | ++ |    |
| CC9-110     | IGHV1-46*01 | IGHD2-2*01  | IGHJ5*01 | 89                      | 10                   | CARGSGGKFFW        | IKRV1-51*02 | IGLJ2*02   | 91                      | 11                   | CGYSSPPPIFF        | CC9-110                    | 0.01     | 0.02      | 0.01      | 3.27      | 1.08      | >10           | >10        | 1830     | 1E+05     | 5218      | 1E+05     | 7102           | 2317    | 3473    | 2922  | CC9-110    | N       | N | N | +  |    |
| CC9-116     | IGHV3-15*01 | IGHD1-1*01  | IGHJ4*02 | 92                      | 11                   | CAMTVYKDFYD        | IKRV4-1*01  | IGKJ2*02   | 96                      | 8                    | CGYSSPPPIFF        | CC9-116                    | 0.01     | 0.02      | 0.01      | >10       | 0.88      | >10           | >10        | 1959     | 2E+05     |           |           |                |         |         |       |            |         |   |   |    |    |

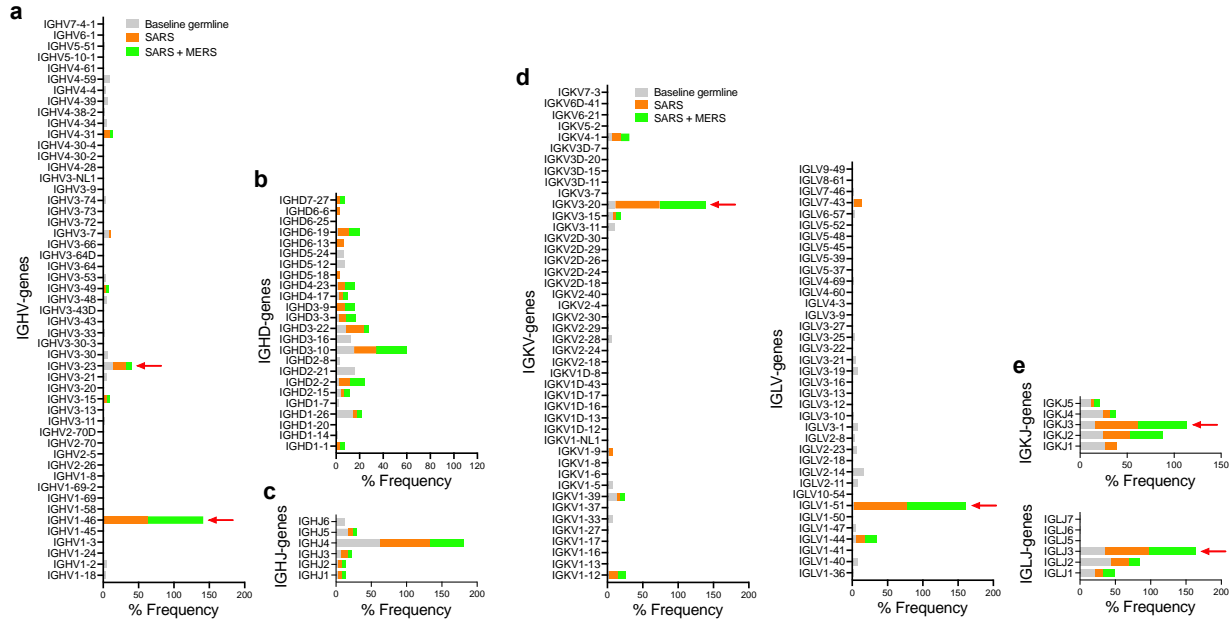

1005  
1006  
1007  
1008  
1009  
1010  
1011  
1012  
1013

**Supplementary Figure 3. Immunoglobulin heavy and light chain gene usage and enrichment in isolated mAbs compared to a reference human germline database.** Baseline germline frequencies of heavy chain genes (IGHV, IGHD and IGHJ genes) (**a**., **b**., **c**) and light chain genes (IGKV, IGLV, IGKJ and IGLJ genes) (**d**., **e**) are shown in grey, and S2 stem helix sarbecovirus bnAbs (SARS: orange) and sarbecovirus + MERS-CoV bnAb (SARS + MERS: green) are shown. Arrows indicate gene enrichments compared to human baseline germline frequencies.



**a**

| Antibody     | Stem-helix peptide |           |           |            |          |           |           |            | S-protein  |                       |           |            |          |                       |           |            |
|--------------|--------------------|-----------|-----------|------------|----------|-----------|-----------|------------|------------|-----------------------|-----------|------------|----------|-----------------------|-----------|------------|
|              | SARS-CoV-2         |           |           |            | MERS-CoV |           |           |            | SARS-CoV-2 |                       |           |            | MERS-CoV |                       |           |            |
|              | Response           | KD (M)    | kon(1/Ms) | koff(1/Ms) | Response | KD (M)    | kon(1/Ms) | koff(1/Ms) | Response   | KD <sup>app</sup> (M) | kon(1/Ms) | koff(1/Ms) | Response | KD <sup>app</sup> (M) | kon(1/Ms) | koff(1/Ms) |
| CC9.130      | 5.92               | 2.40E-10  | 6.16E+05  | 1.48E-04   | 6.43     | 1.50E-09  | 7.64E+05  | 1.15E-03   | 1.14       | <1.0E-12              | 5.47E+05  | <1.0E-7    | 1.22     | 1.89E-09              | 3.22E+05  | 6.11E-04   |
| CC9.131      | 4.77               | <1.0E-12  | 6.64E+05  | <1.0E-7    | 4.53     | <1.0E-12  | 7.64E+05  | <1.0E-7    | 0.95       | 1.07E-10              | 4.01E+05  | 4.27E-05   | 0.69     | 6.98E-10              | 1.85E+05  | 1.29E-04   |
| CC25.103     | 5.09               | 2.72E-11  | 6.46E+05  | 1.76E-05   | 5.51     | 3.64E-10  | 7.51E+05  | 2.73E-04   | 1.12       | <1.0E-12              | 4.80E+05  | <1.0E-7    | 1.15     | 1.32E-09              | 2.71E+05  | 3.57E-04   |
| CC25.106     | 5.50               | <1.0E-12  | 6.25E+05  | <1.0E-7    | 5.98     | 3.42E-10  | 7.32E+05  | 2.50E-04   | 0.96       | <1.0E-12              | 4.01E+05  | <1.0E-7    | 0.97     | 4.51E-10              | 2.65E+05  | 1.19E-04   |
| CC25.108     | 5.33               | 9.73E-11  | 6.25E+05  | 6.08E-05   | 5.72     | 9.47E-10  | 7.39E+05  | 6.99E-04   | 1.17       | <1.0E-12              | 5.46E+05  | <1.0E-7    | 1.21     | 2.04E-09              | 2.92E+05  | 5.95E-04   |
| CC25.112     | 6.08               | 2.41E-10  | 6.80E+05  | 1.64E-04   | 5.70     | 1.61E-09  | 9.26E+05  | 1.49E-03   | 1.09       | <1.0E-12              | 4.27E+05  | <1.0E-7    | 0.91     | 4.40E-09              | 3.05E+05  | 1.34E-03   |
| CC67.105     | 5.88               | 2.06E-10  | 7.05E+05  | 1.46E-04   | 6.53     | 1.45E-09  | 8.26E+05  | 1.20E-03   | 1.20       | <1.0E-12              | 5.66E+05  | <1.0E-7    | 1.11     | 1.96E-09              | 3.06E+05  | 6.00E-04   |
| CC68.109     | 4.72               | 7.83E-11  | 5.60E+05  | 4.38E-05   | 4.78     | 1.11E-10  | 6.53E+05  | 7.23E-05   | 0.88       | 6.96E-11              | 3.64E+05  | 2.53E-05   | 0.74     | <1.0E-12              | 1.98E+06  | <1.0E-7    |
| CC84.102     | 5.92               | 5.49E-11  | 7.23E+05  | 3.97E-05   | 5.09     | 1.64E-09  | 1.17E+06  | 1.92E-03   | 0.99       | <1.0E-12              | 4.41E+05  | <1.0E-7    | 0.99     | 2.17E-09              | 2.93E+05  | 6.36E-04   |
| CC92.133     | 5.48               | <1.0E-12  | 9.60E+05  | <1.0E-7    | 5.36     | 1.09E-10  | 1.16E+06  | 1.27E-04   | 1.11       | 2.33E-11              | 4.62E+05  | 1.08E-05   | 1.04     | 6.54E-10              | 2.32E+05  | 1.52E-04   |
| CC92.147     | 3.90               | 4.48E-10  | 2.60E+05  | 1.16E-04   | 4.08     | 6.95E-10  | 2.91E+05  | 2.02E-04   | 0.80       | 3.17E-10              | 3.49E+05  | 1.11E-04   | 0.63     | 4.84E-10              | 2.19E+05  | 1.06E-04   |
| CC95.104     | 5.63               | 1.72E-10  | 5.73E+05  | 9.82E-05   | 5.93     | 9.43E-10  | 8.30E+05  | 7.82E-04   | 1.24       | <1.0E-12              | 8.02E+05  | <1.0E-7    | 1.23     | 8.65E-10              | 3.80E+05  | 3.28E-04   |
| CC95.108     | 5.81               | 5.64E-11  | 5.39E+05  | 3.04E-05   | 6.45     | 3.98E-10  | 6.13E+05  | 2.44E-04   | 1.06       | <1.0E-12              | 5.28E+05  | <1.0E-7    | 1.09     | 3.41E-10              | 3.45E+05  | 1.18E-04   |
| CC95.110     | 5.18               | <1.0E-12  | 6.28E+05  | <1.0E-7    | 5.35     | 2.56E-10  | 7.54E+05  | 1.93E-04   | 0.87       | 2.81E-10              | 3.33E+05  | 9.34E-05   | 0.80     | 5.18E-10              | 2.04E+05  | 1.05E-04   |
| CC95.121     | 4.84               | 1.18E-10  | 6.04E+05  | 7.11E-05   | 4.91     | 1.67E-09  | 9.08E+05  | 1.51E-03   | 0.93       | 7.09E-11              | 3.74E+05  | 2.65E-05   | 0.80     | 3.13E-09              | 2.10E+05  | 6.56E-04   |
| CC99.103     | 5.43               | <1.0E-12  | 9.27E+05  | <1.0E-7    | 5.39     | 6.30E-11  | 1.01E+06  | 6.35E-05   | 1.11       | <1.0E-12              | 5.38E+05  | <1.0E-7    | 1.10     | 3.09E-10              | 2.80E+05  | 8.66E-05   |
| CC9.130-iGL  | 0.76               | 1.08E-08  | 2.88E+05  | 3.10E-03   | 0.15     | ND        | ND        | ND         | 0.12       | ND                    | ND        | ND         | 0.13     | ND                    | ND        | ND         |
| CC9.131-iGL  | 3.22               | 1.77E-09  | 2.68E+05  | 4.75E-04   | 2.12     | 5.61E-09  | 5.16E+05  | 2.16E-03   | 0.31       | 9.29E-10              | 1.69E+05  | 1.57E-04   | 0.02     | ND                    | ND        | ND         |
| CC25.103-iGL | 4.47               | 1.35E-09  | 3.56E+05  | 4.81E-04   | 1.01     | 3.45E-09  | 1.19E+06  | 2.95E-03   | 0.66       | 5.53E-10              | 2.30E+05  | 1.27E-04   | 0.01     | ND                    | ND        | ND         |
| CC25.106-iGL | 7.23               | 4.09E-10  | 1.08E+06  | 4.42E-04   | 4.84     | 1.12E-09  | 3.01E+06  | 2.85E-03   | 0.92       | <1.0E-12              | 2.56E+05  | <1.0E-7    | 0.43     | 7.14E-09              | 3.08E+05  | 2.20E-03   |
| CC25.108-iGL | 5.45               | 8.75E-10  | 5.12E+05  | 4.48E-04   | 2.65     | 1.72E-09  | 4.32E+05  | 6.08E-04   | 1.10       | <1.0E-12              | 4.74E+05  | <1.0E-7    | 0.39     | 2.23E-09              | 1.87E+05  | 4.18E-04   |
| CC25.112-iGL | 4.42               | 3.10E-09  | 5.00E+05  | 1.55E-03   | 1.34     | 2.81E-09  | 7.46E+05  | 1.64E-03   | 0.66       | 1.21E-09              | 2.06E+05  | 2.49E-04   | 0.04     | ND                    | ND        | ND         |
| CC67.105-iGL | 4.16               | 1.19E-09  | 2.49E+05  | 2.96E-04   | 2.24     | 4.99E-09  | 2.63E+05  | 1.21E-03   | 0.57       | 7.96E-10              | 2.92E+05  | 2.33E-04   | 0.29     | 3.87E-09              | 2.24E+05  | 8.69E-04   |
| CC68.109-iGL | 4.89               | 9.469E-10 | 5.24E+05  | 4.96E-04   | 3.89     | 2.027E-09 | 7.10E+05  | 1.44E-03   | 0.74       | 2.06E-10              | 2.37E+05  | 4.89E-05   | 0.31     | 1.26E-09              | 1.15E+06  | 1.45E-03   |
| CC84.102-iGL | 5.65               | 3.11E-09  | 3.57E+05  | 1.11E-03   | 2.25     | 2.20E-09  | 8.08E+05  | 1.36E-03   | 0.91       | <1.0E-12              | 3.70E+05  | <1.0E-7    | 0.53     | 3.27E-09              | 2.64E+05  | 8.65E-04   |
| CC92.133-iGL | 4.63               | 1.52E-09  | 4.32E+05  | 6.56E-04   | 2.08     | 2.11E-09  | 7.45E+05  | 1.57E-03   | 0.69       | <1.0E-12              | 1.99E+05  | <1.0E-7    | 0.02     | ND                    | ND        | ND         |
| CC92.147-iGL | 1.61               | 1.95E-09  | 5.03E+05  | 9.82E-04   | 0.16     | ND        | ND        | ND         | 0.08       | ND                    | ND        | ND         | 0.01     | ND                    | ND        | ND         |
| CC95.104-iGL | 2.55               | 1.131E-10 | 8.63E+04  | <1.0E-7    | 1.78     | 3.05E-09  | 1.75E+05  | 2.03E-04   | 0.62       | 1.44E-09              | 1.06E+06  | 1.52E-03   | 0.12     | ND                    | ND        | ND         |
| CC95.108-iGL | 6.20               | 3.41E-10  | 3.78E+05  | 1.29E-04   | 6.61     | 1.72E-09  | 4.63E+05  | 8.02E-04   | 0.89       | 3.23E-10              | 4.38E+05  | 1.41E-04   | 0.87     | 1.85E-09              | 3.06E+05  | 5.66E-04   |
| CC95.110-iGL | 6.36               | 1.94E-09  | 4.36E+05  | 8.46E-04   | 3.74     | 3.69E-09  | 1.04E+06  | 2.80E-03   | 0.69       | 6.83E-09              | 4.11E+05  | 2.80E-03   | 0.44     | 2.60E-09              | 2.01E+05  | 5.22E-04   |
| CC95.121-iGL | 2.50               | 4.07E-09  | 5.97E+05  | 2.43E-03   | 0.54     | 2.27E-09  | 6.91E+05  | 1.57E-03   | 0.26       | 1.27E-08              | 5.43E+05  | 6.90E-03   | 0.22     | 4.02E-09              | 1.87E+05  | 7.53E-04   |
| CC99.103-iGL | 4.62               | 1.83E-09  | 4.00E+05  | 7.30E-04   | 2.71     | 3.51E-09  | 7.27E+05  | 2.35E-03   | 0.68       | 1.00E-10              | 2.17E+05  | 2.18E-05   | 0.06     | ND                    | ND        | ND         |
| DEN3         | 0.16               | ND        | ND        | ND         | 0.16     | ND        | ND        | ND         | 0.01       | ND                    | ND        | ND         | 0.05     | ND                    | ND        | ND         |

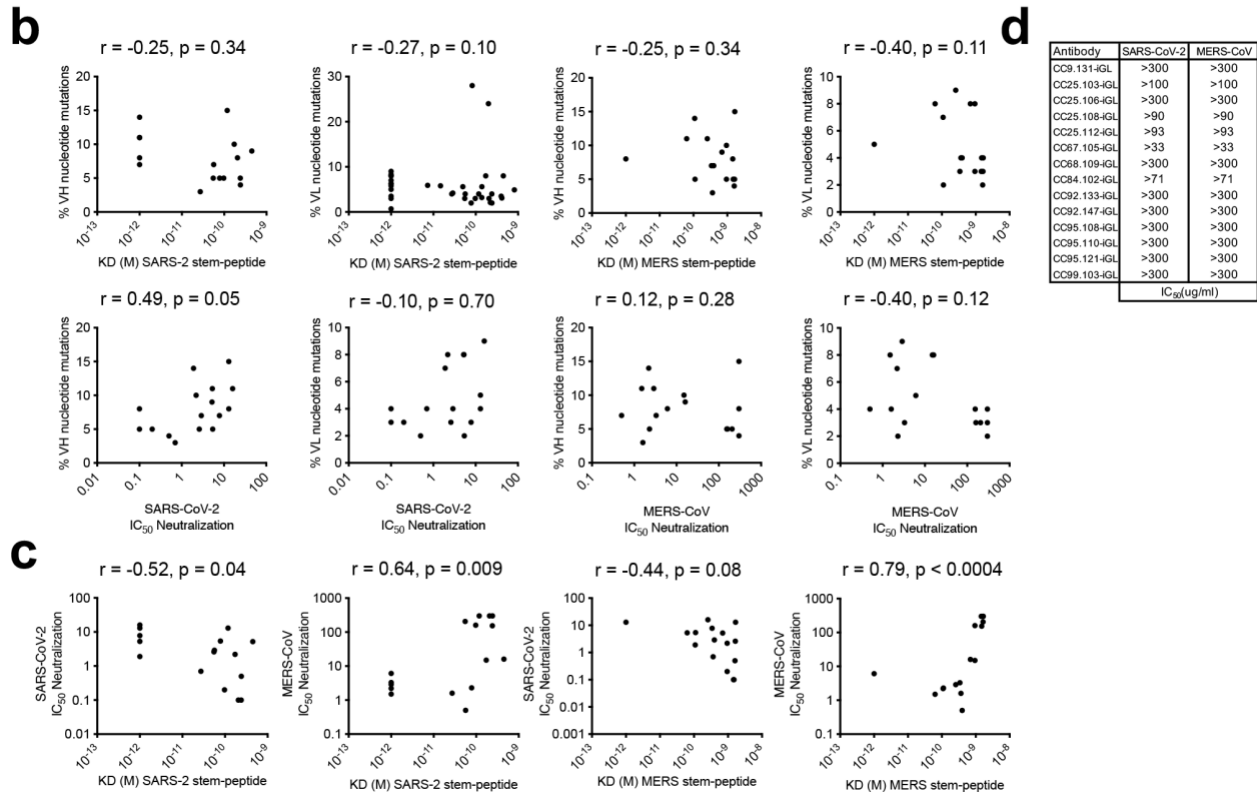

1029  
1030  
1031  
1032  
1033  
1034  
1035  
1036  
1037  
1038

**Supplementary Figure 5. BLI Binding of S2 stem bnAbs and their iGLs with SARS-CoV-2 and MERS-CoV stem-helix peptides and S-proteins and association with SHMs and Neutralization.** **a.** BioLayer Interferometry (BLI) binding kinetics of 16 S2 stem-helix bnAbs and their inferred germline (iGL) Ab versions with SARS-CoV-2 and MERS-CoV stem-helix peptides and S-proteins. Binding kinetics were obtained using the 1:1 binding kinetics fitting model on ForteBio Data Analysis software and maximum binding responses, dissociations constants ( $K_D$ ) and on-rate ( $k_{on}$ ) and off-rate constants ( $k_{off}$ ) for each antibody peptide interaction are shown.  $K_D$ ,  $k_{on}$  and  $k_{off}$  values were calculated only for antibody-antigen interactions where a maximum binding response of

1039 0.2nm was obtained. MAbs were also tested with SARS-CoV-2 and MERS-CoV S-  
1040 proteins and the responses, apparent binding constants ( $K_D^{App}$ ) and  $k_{on}$  and  $k_{off}$  constants  
1041 for each antibody-antigen interaction are indicated. The iGL Ab versions of stem-helix  
1042 bnAbs showed reduced binding compared their mature versions. **b.** Correlations of stem-  
1043 helix mAb binding ( $K_D$  (M) values) to SARS-CoV-2 and MERS-CoV peptides and virus  
1044 neutralization with heavy (VH) chain and light (VL) chain SHM levels. **c.** Correlations of  
1045 stem-helix mAb binding ( $K_D$  (M) values) to SARS-CoV-2 and MERS-CoV peptides with  
1046 neutralization against their corresponding viruses. Correlations were determined by  
1047 nonparametric Spearman correlation two-tailed test with 95% confidence interval. The  
1048 Spearman correlation coefficient (r) and p-value are indicated. **d.** IC<sub>50</sub> neutralization of S2  
1049 stem-helix bnAb iGLs with SARS-CoV-2 and MERS-CoV.

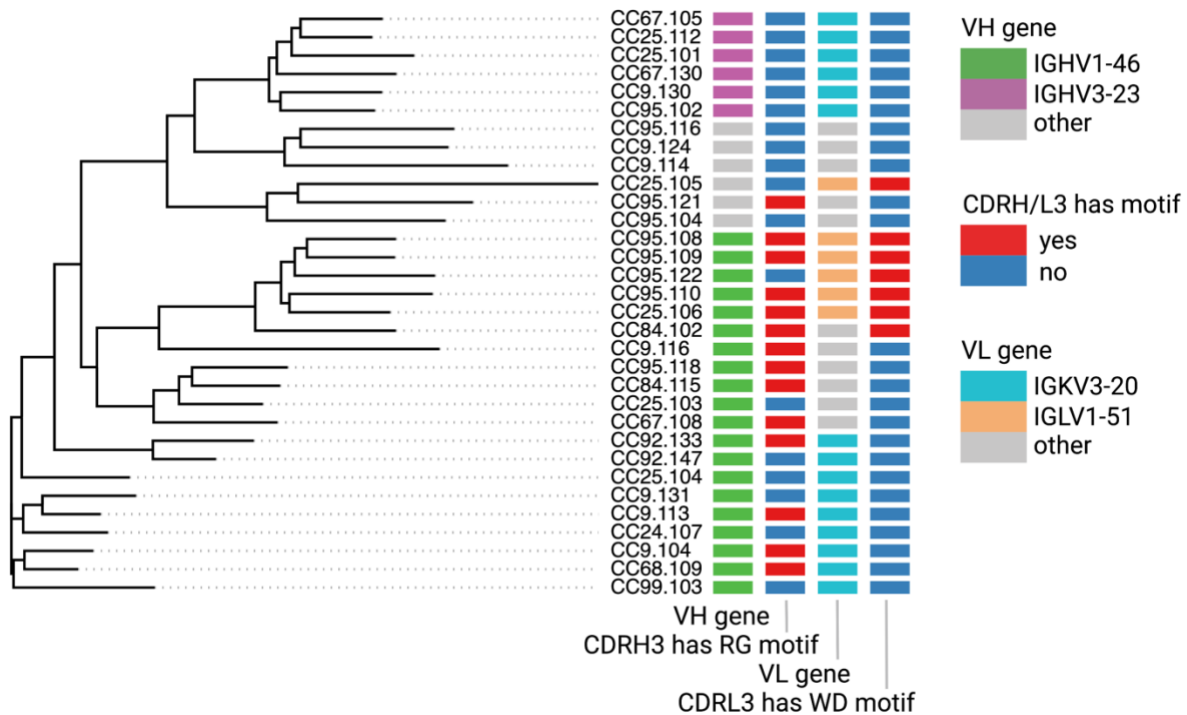

1050  
1051  
1052  
1053  
1054  
1055  
1056  
1057  
1058  
1059  
1060  
1061

**Supplementary Figure 6. Immunogenetics analysis of heavy and light chain sequences of 32 unique S2 stem-helix mAbs.** The phylogenetic tree represents concatenated heavy and light chain amino acid sequences of 32 S2 stem-helix mAbs. mAbs IDs are shown on the right. Four colored columns on the right show the following characteristics of mAbs (from left to right): (1) the germline V gene of each heavy chain (IGHV1-46: green, IGHV3-23: plum, others: gray), (2) the presence of RG motif in the amino acid sequence of each CDRH3 (motif is present: red, motif is missing: blue), (3) the germline V gene of each light chain (IGKV3-20: sky, IGLV1-51: cantaloupe, others: gray), (4) the presence of WD motif in the amino acid sequence of each CDRL3 (motif is present: red, motif is missing: blue).

1062

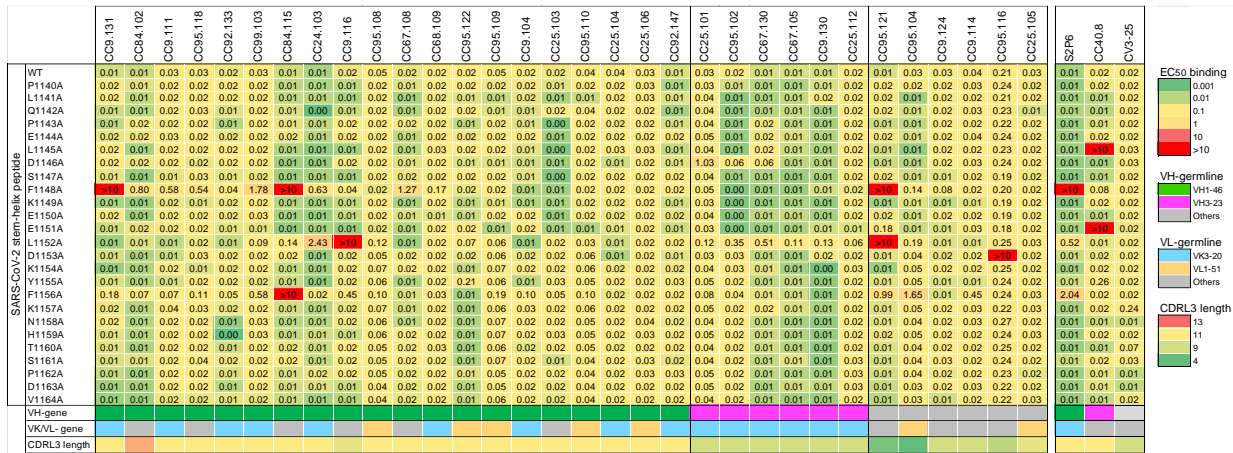

1063

1064

1065

1066

1067

1068

1069

1070

1071

**Supplementary Figure 7. Epitope mapping of S2 stem-helix bnAbs with SARS-CoV-2 stem-helix peptide alanine scan mutants.** Heatmap showing EC<sub>50</sub> ELISA binding titers of S2-stem helix bnAbs to 25mer SARS-CoV-2 stem-helix peptide and its alanine scan mutants. Three hydrophobic residues, F<sup>1148</sup>, L<sup>1152</sup> and F<sup>1156</sup> were commonly targeted by stem-helix bnAbs. S2 stem-helix bnAbs are grouped based on their heavy chain gene usage (IGHV1-46, IGHV3-23 and others). The light chain germline genes (IGKV3-20, IGLV1-51 and other) and CDRL3 lengths are shown. S2P6, CC40.8 and CV3-25 S2 stem-helix mAbs were used as controls.



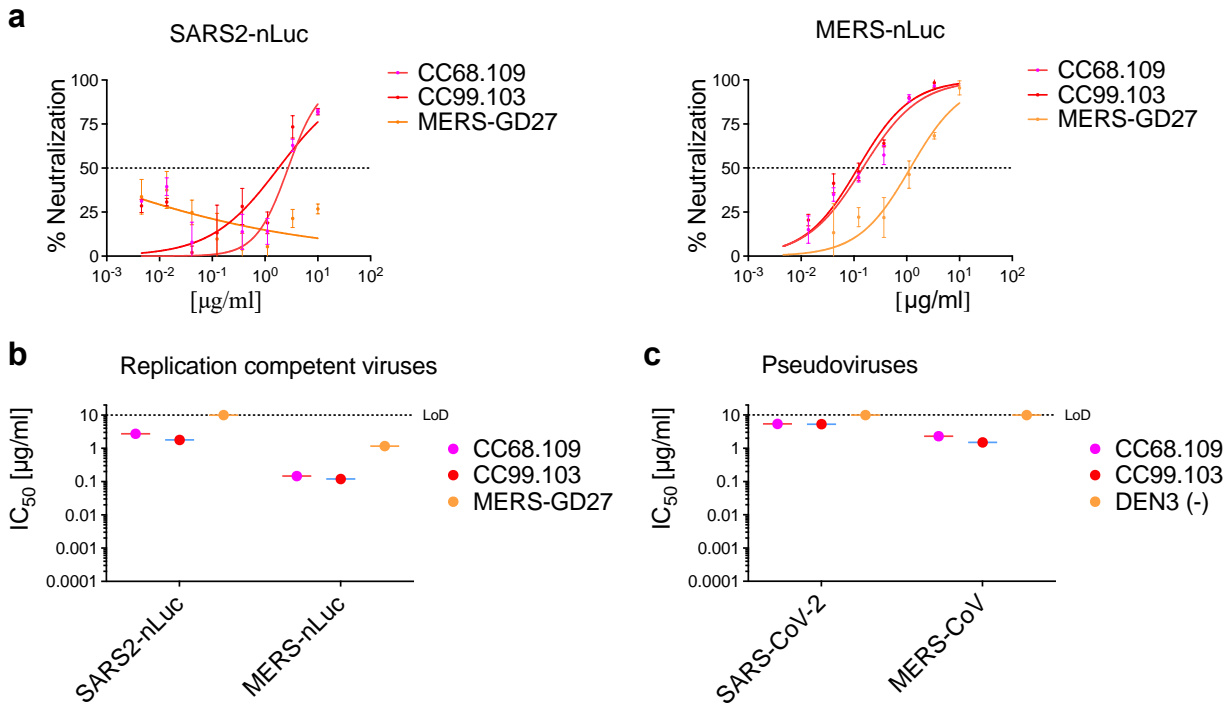

1072  
1073  
1074  
1075  
1076  
1077  
1078  
1079  
1080

**Supplementary Figure 8. Neutralization of replication competent betacoronaviruses by select S2-stem helix bnAbs.** **a.** Neutralization of replication competent viruses encoding SARS-CoV-2 (SARS2-nLuc), and MERS-CoV (MERS-nLuc) by 2 select S2 stem-helix bnAbs, CC68.109, and CC99.103. MERS-GD27 antibody (2) was a positive control for the MERS-CoV neutralization assay. **b-c.** Comparison of IC<sub>50</sub> neutralization titers of S2 stem-helix bnAbs with replication-competent (**b**) and pseudoviruses (**c**) of SARS-CoV-2 and MERS-CoV.

1081 **References**

1082

- 1083 1. E. Q. Wang *et al.*, Assessing the Potential Risk of Cross-Reactivity Between Anti-  
1084 Bococizumab Antibodies and Other Anti-PCSK9 Monoclonal Antibodies. *BioDrugs* **33**,  
1085 571-579 (2019).
- 1086 2. P. Niu *et al.*, Ultrapotent Human Neutralizing Antibody Repertoires Against Middle East  
1087 Respiratory Syndrome Coronavirus From a Recovered Patient. *J Infect Dis* **218**, 1249-  
1088 1260 (2018).

1089

1090
